1 **SHORT COMMUNICATION**

2

3 **TITLE.** Patch-clamp recordings in slices of telencephalon, diencephalon and  
4 rhombencephalon of salamanders.

5

6 **ABBREVIATED TITLE.** Single cell electrophysiology in salamanders.

7

8 **AUTHORS.** Aurélie Flaive<sup>1</sup>, Dimitri Ryczko<sup>1,2,3,4\*</sup>.

9

10 **AFFILIATIONS.** <sup>1</sup>Département de Pharmacologie-Physiologie, Faculté de médecine  
11 et des sciences de la santé, Université de Sherbrooke, Sherbrooke, QC, Canada.

12 <sup>2</sup>Centre de recherche du Centre Hospitalier Universitaire de Sherbrooke,  
13 Sherbrooke, QC, Canada. <sup>3</sup>Institut de Pharmacologie de Sherbrooke, Sherbrooke,  
14 QC, Canada. <sup>4</sup>Centre des neurosciences de Sherbrooke, Sherbrooke, QC,  
15 Canada.

16

17 **\*CORRESPONDING AUTHOR.**

18

19 **Dr. Dimitri Ryczko**

20 Département de Pharmacologie-Physiologie

21 Faculté de médecine et des sciences de la santé

22 Université de Sherbrooke,

23 Sherbrooke (Québec) Canada J1H 5N4

24 Tel: 1 (819) 821 8000 (ext. 75347) | Email: [dimitri.ryczko@usherbrooke.ca](mailto:dimitri.ryczko@usherbrooke.ca)

25

26 **CONFLICT OF INTEREST.** The authors declare no competing financial interests.

27

28 **ABSTRACT**

29           The salamander is a key limbed vertebrate from which many major scientific  
30 questions can be addressed in the fields of motor control, evolutionary biology, and  
31 regeneration biology. An important gap of knowledge is the description of the  
32 electrophysiological properties of the neurons constituting their central nervous  
33 system. To our knowledge, some patch-clamp electrophysiological recordings  
34 were done in the spinal cord and recently in hindbrain slices, but not in any higher  
35 brain region. Here, we present a method to obtain patch-clamp recordings in slices  
36 of the telencephalon, diencephalon and rhombencephalon of salamanders. The  
37 method includes dissection of the brain, brain slice preparation, visual identification  
38 of neurons and patch-clamp recordings. We provide single cell recordings in the  
39 rhombencephalon, diencephalon and telencephalon of salamanders. This method  
40 should open new avenues to dissect the operation of salamander brain circuits at  
41 the cellular level.

42

43 **KEYWORDS**

44 Salamander, patch-clamp recordings, brain slices, telencephalon, diencephalon,

45 rhombencephalon.

46

47 **HIGHLIGHTS**

48 - Salamander brain slices of telencephalon, diencephalon, and rhombencephalon

49 - Patch-clamp recordings in salamander brain slices

50 - The salamander as a model to decipher tetrapod neural microcircuits

51

52 **1. INTRODUCTION**

53       Among limbed vertebrates, the salamander is a unique animal model to  
54 decipher the organisation of the locomotor neural circuitry, but also its evolution  
55 and its regeneration after major lesions. Salamanders swim underwater and walk  
56 on land, therefore providing an opportunity to dissect the interactions between the  
57 neural circuits controlling axial movements and those controlling limb movements  
58 (Ryczko et al. 2015). They are the closest representative of the first tetrapods,  
59 therefore allowing researchers to infer the evolution of the locomotor circuitry  
60 during the transition to land (Ijspeert et al. 2007). They regenerate their spinal cord  
61 after a complete transection (Chevallier et al. 2004) or after major destruction of  
62 their brain dopaminergic system (Joven et al. 2018), providing a unique opportunity  
63 to dissect the reconnection maps leading to functional recovery in limbed  
64 vertebrates.

65       The available knowledge of the electrophysiological properties of central  
66 salamander neurons is limited compared to other models. Mainly extracellular  
67 electrophysiological recordings were obtained from axial ventral roots or limb  
68 nerves during fictive locomotion (Ryczko et al. 2015), or from reticular nuclei  
69 following stimulation of the Mesencephalic Locomotor Region, a brainstem region  
70 that controls locomotion in vertebrates (Ryczko et al. 2016a). Sharp intracellular  
71 recordings were done during fictive locomotion in spinal circuits controlling limb  
72 (Wheatley and Stein 1992) or axial movements (Perrins and Soffe 1996). Patch-  
73 clamp recordings were successfully used to describe the cholinergic modulation of  
74 limb motoneuron activity in spinal cord slices (Chevallier et al. 2006). At the brain

75 level, only one study used patch-clamp recordings in hindbrain slices, to  
76 demonstrate the role of calcium-induced calcium release in spontaneous miniature  
77 outward currents (Yaeger and Coddington 2018). However, to our knowledge no  
78 patch-clamp recording of brain region located rostrally to the hindbrain were done  
79 in salamanders.

80 Here, we describe how to generate salamander brain slices, how to  
81 visualize the neurons and how to perform patch-clamp recordings. We present the  
82 first patch-clamp recordings of neurons in the diencephalon and telencephalon in  
83 salamander brain slices. This method should be useful to identify mechanisms at  
84 the cellular level in salamander brain microcircuits.

85

86 **2. MATERIAL AND METHODS**

87 *2.1. Ethics statement*

88 The procedures conformed to the guidelines of the Canadian Council on Animal  
89 Care and were approved by the animal care and use committees of the Université  
90 de Sherbrooke (QC, Canada). Care was taken to minimize the number of animals  
91 used and their suffering.

92

93 *2.2. Animals*

94 A total of 4 Mexican axolotls (*Ambystoma mexicanum*) purchased from the  
95 Ambystoma Genetic Stock Center (University of Kentucky, KY, USA) with snout-  
96 vent length ranging from 8 to 12 cm were used for the present study. The animals  
97 were kept in aquariums at 17-19°C and fed twice per week with fish pellets.

98

99 *2.3. Identification of brain regions*

100 The striatum (Fig. 2A) was identified as part of the ventrolateral pallium based on  
101 salamander telencephalon atlases (Northcutt and Kicliter 1980, ten Donkelaar  
102 1998) and our previous anatomical studies showing that injection of a neural tracer  
103 in the striatum retrogradely labels dopaminergic neurons in the posterior  
104 tuberculum, located at the border of the diencephalon and mesencephalon  
105 (Ryczko et al. 2016b). This ascending dopaminergic pathway is considered  
106 analogous to the nigrostriatal pathway in mammals (Ryczko et al. 2016b).

107 The posterior tuberculum (Fig. 2A) was identified based on i) our previous  
108 anatomical studies showing that dopaminergic neurons in the posterior tuberculum

109 send ascending projections to the striatum (Ryczko et al. 2016b, see also Joven  
110 et al. 2018) and descending dopaminergic projections to the Mesencephalic  
111 Locomotor Region (Ryczko et al. 2016b); ii) our previous physiological  
112 experiments in isolated brains showing that stimulation of the posterior tuberculum  
113 evokes large calcium responses in reticulospinal neurons, that relay the locomotor  
114 command to the spinal cord (Ryczko et al. 2016b).

115 The middle reticular nucleus (Fig. 2A) was identified based on: i) previous  
116 anatomical studies showing the distribution of reticulospinal neurons in this  
117 reticular nucleus (Naujoks-Manteuffel and Manteuffel 1988; Sanchez-Camacho et  
118 al., 2001; Chevallier et al. 2004); ii) our previous anatomical results showing that  
119 injection of a tracer in this nucleus retrogradely labels neurons in the  
120 Mesencephalic Locomotor Region (Ryczko et al. 2016a,b); iii) our previous  
121 physiological results showing that reticulospinal neurons in this nucleus respond  
122 following stimulation of the Mesencephalic Locomotor Region (Ryczko et al.  
123 2016b); iv) our previous physiological results showing that stimulation of this  
124 nucleus generates steering movements in a salamander semi-intact preparation  
125 (Ryczko et al. 2016c).

126

#### 127 *2.4. Brain dissection*

128 Animals were anesthetized with tricaine methanesulfonate (MS-222, 200 mg/mL,  
129 Sigma) and transferred into a dissection chamber filled with artificial cerebrospinal  
130 fluid (aCSF) (in mM: 124 NaCl, 3 KCl, 1.25 KH<sub>2</sub>PO<sub>4</sub>, 1.3 MgSO<sub>4</sub>, 26 NaHCO<sub>3</sub>, 10  
131 Dextrose, and 1.2 CaCl<sub>2</sub>, pH 7.3–7.4, 290–300 mOsmol/kg) bubbled with 95% O<sub>2</sub>



132 and 5% CO<sub>2</sub>. After evisceration, the skin and muscles were removed carefully to  
133 expose the brain and the first two segments of the spinal cord. The meninges were  
134 carefully removed, and the cranial nerves were sectioned. A complete transection  
135 was done at the level of the first spinal segment, and the brain was removed and  
136 dipped in an ice-cold sucrose-based solution (in mM: 3 KCl, 1.25 KH<sub>2</sub>PO<sub>4</sub>, 4  
137 MgSO<sub>4</sub>, 26 NaHCO<sub>3</sub>, 10 Dextrose, 0.2 CaCl<sub>2</sub>, 219 Sucrose, pH 7.3–7.4, 300-320  
138 mOsmol/kg) bubbled with 95% O<sub>2</sub> and 5% CO<sub>2</sub>. For slices at the level of the  
139 striatum or posterior tuberculum, a transverse section was done with a razor blade  
140 at the level of the olfactory bulbs (Fig. 2A). For slices at the level of the brainstem,  
141 the transverse section was done at the junction between telencephalon and  
142 diencephalon.

143

#### 144 *2.5. Brain slicing*

145 The brain was then glued at the level of the transverse section onto the specimen  
146 disk and placed in the slicing chamber filled with the ice-cold sucrose-based  
147 solution described above, with the vibratome slicing blade facing the dorsal side of  
148 the brain. Coronal slices (350 μm thickness) were prepared with a VT1000S  
149 vibrating-blade microtome (also called vibratome, Leica). Blade progression was  
150 visually inspected with a stereomicroscope (Leica) installed over the VT1000S.  
151 During slicing, high frequency oscillations of the vibratome blade (100 Hz, scale  
152 setting “10”) and a slow blade progression (0.15 mm/s, scale setting “3”) were  
153 used. To lessen the brain movements evoked by the blade vibrations, a small  
154 brush was gently positioned against the ventral side of the brain, at the level of the

155 slice being cut. Slices were then allowed to rest at room temperature for an hour  
156 in a chamber filled with aCSF bubbled with 95% O<sub>2</sub> and 5% CO<sub>2</sub>. Brain slices were  
157 carefully placed at the bottom of the recording chamber with the brush under the  
158 microscope and secured in place with two platinum wires disposed on the left and  
159 right sides of the slice.

160

## 161 *2.6. Whole-cell patch-clamp recordings*

162 Whole-cell recordings were carried out at room temperature in a recording  
163 chamber perfused with aCSF (100 mL/h) bubbled with 95% O<sub>2</sub> and 5% CO<sub>2</sub>.  
164 Neurons were visualized under an Axio Examiner Z1 epifluorescent microscope  
165 (Zeiss) equipped with 5× air objective and a 40× water-immersion objective,  
166 differential interference contrast (DIC) components, an ORCA-Flash4.0 V3 Digital  
167 CMOS camera (Hamamatsu), an halogen light source and a Colibri 7 fluorescent  
168 light source (Zeiss). Patch pipettes were pulled from borosilicate glass capillaries  
169 (1.0 mm outside diameter, 0.58 mm inside diameter, 1B100F-4, World Precision  
170 Instruments) using a P-1000 puller (Sutter Instruments). Pipettes (resistance 6–12  
171 MΩ) were filled with a solution containing (in mM) 140 K-gluconate, 5 NaCl, 2  
172 MgCl<sub>2</sub>, 10 HEPES, 0.5 EGTA, 2 Tris ATP salt, 0.4 Tris GTP salt, pH 7.2–7.3, 280–  
173 300 mOsmol/kg, 0.05 Alexa Fluor 594 or 488, and 0.2% biocytin. Alexa Fluor is  
174 useful used to monitor the morphology of the recorded neuron during the  
175 experiment. When searching for a cell to record, positive pressure was applied  
176 through the glass pipette to prevent it from getting clogged. The neuron membrane  
177 was approached with a pipette using a motorized micromanipulator (Sutter

178 instruments). A gigaseal was established by removing the positive pressure. The  
179 membrane potential was held at -60 mV, and the membrane patch was suctioned.  
180 The pipette resistance and capacitance were compensated electronically, and the  
181 neurons were recorded in current-clamp mode. Neurons were discarded when  
182 action potential amplitude was less than 40 mV or when the resting membrane  
183 potential was too depolarized (>-45 mV). Patch-clamp recordings were performed  
184 using a Multiclamp 700B amplifier and a Digidata 1550B digitizer coupled with a  
185 computer equipped with PClamp 10 software (Axon Instruments).

186

### 187 *2.7. Drugs*

188 N-Methyl-D-aspartic acid (NMDA) was purchased from Sigma and diluted to the  
189 final concentration of 2 mM in aCSF and applied locally over the recorded neuron  
190 with a glass micropipette (tip diameter ~ 1  $\mu$ m) using pressure pulses (50 ms  
191 duration, 5 psi) applied with a Picospritzer III (Parker).

192

193 **3. RESULTS**

194 *3.1. Neuron visualization*

195 The brain slices were prepared with the microtome and transferred under the  
196 microscope (Fig.1 A-B). The quality of the slice was validated by visual inspection  
197 under the microscope with low magnification (5× objective). This step was also  
198 used to confirm the rostrocaudal location of the slice based on previous studies  
199 and available salamander brain atlases (see section 2.3 in the Methods). Neurons  
200 were visualized at higher magnification with the 40× objective coupled with DIC  
201 components (Fig. 1C-D). The positive pressure applied through the pipette was  
202 essential to navigate through the slice at different depths. As a rule, we chose cells  
203 that were deeper than the surface layer, showed a regular cell body shape, without  
204 being too dark at their membrane border, and whose membrane clearly displayed  
205 a reversible pressure-evoked invagination when the patch pipette was  
206 approached.

207

208 *3.2. Whole-cell patch-clamp recordings*

209 We performed whole-cell recordings in current-clamp mode in neurons located in  
210 the striatum (Fig. 2A,B) posterior tuberculum (Fig. 2A,C-E) and middle reticular  
211 nucleus (Fig. 2A,D). A total of 8 neurons were patched out of the 4 animals used.  
212 Stable recordings were obtained in 4 neurons from 3 animals. When applying  
213 increments of positive currents through the patch electrode, these neurons  
214 responded by spiking action potentials (> 40 mV) in the striatum (Fig. 2B), posterior  
215 tuberculum (Fig. 2C) and middle reticular nucleus (Fig. 2D). Increasing the

216 intensity of positive current steps increased spiking frequency (Fig. 2B-D).  
217 Applying negative currents evoked membrane potential hyperpolarization in  
218 neurons from the three regions (Fig. 2B-D), sometimes followed by a small  
219 depolarization during the application of the negative current (“sag”) (e.g. Fig. 2D,  
220 right panel). This usually indicates the presence of a hyperpolarization-activated  
221 depolarizing current, such as the  $I_h$ , as documented in salamander motoneurons  
222 (Chevallier et al. 2006). Some neurons displayed a post inhibitory rebound and  
223 post inhibitory spiking (Fig. 2B,D, right panels). The other 4 patched neurons were  
224 discarded because of either unstable membrane potential despite strong negative  
225 currents tonically applied to the cell (-80 to -220 pA), rapid cell loss, or small action  
226 potential amplitude (< 40 mV).

227         Next, we determined whether local microinjection of drugs over the recorded  
228 neuron could be used to evoke reproducible spiking responses. Repeated  
229 microinjections of a glutamatergic agonist (NMDA 2 mM, 50 ms pulse, 5 psi)  
230 evoked a consistent burst of action potentials in the neuron recorded in the  
231 posterior tuberculum (Fig. 2E), suggesting that these neurons express functional  
232 glutamatergic receptors. This is consistent with previous observations showing that  
233 glutamate microinjections evoke calcium responses in reticulospinal neurons  
234 recorded with calcium imaging in isolated salamander brainstem preparations  
235 (Ryczko et al. 2016a).

236 **4. DISCUSSION**

237 In the present study we developed the use of patch-clamp recordings of  
238 neurons recorded from brain slices of the telencephalon, diencephalon and  
239 rhombencephalon of salamanders. We show that microinjections of drugs can be  
240 used to design experiments aiming at investigating cellular mechanisms in brain  
241 slices.

242 Previously, no patch-clamp recordings were done in salamander brain  
243 regions higher than the spinal cord (Chevallier et al. 2006) and hindbrain (Yaeger  
244 and Coddington 2018). To our knowledge, we provide the first whole-cell  
245 recordings in the salamander diencephalon and telencephalon. A comprehensive  
246 study of the electrophysiological properties of these neurons was not within the  
247 scope of the present study. However, such characterization is being carried out in  
248 our laboratory and will be reported in the future.

249 The recent studies have established that the brain and spinal cord of  
250 salamanders show striking similarities with that of other vertebrates, including  
251 mammals (Ryczko et al. 2016a,b,c). Together with the recent study of Yaeger and  
252 Coddington (2018), our present study demonstrates that cellular mechanisms can  
253 be studied in any brain area of salamanders using brain slices as classically done  
254 in rodents. This approach is an important addition to the diversity of preparations  
255 available in salamander neuroscience research, including isolated spinal cords  
256 (Ryczko et al. 2015), isolated brains (Ryczko et al. 2016a,b), and semi-intact  
257 preparations (Ryczko et al. 2016c). Together with the recent expansion of the  
258 genetic toolbox (e.g. Joven et al. 2018), and the use of modeling and robotics

259 (Ijspeert et al. 2007), future work should open new horizons in the understanding  
260 of intact and regenerated tetrapod neural circuits using the salamander as an  
261 animal model.

262

263 **FIGURE LEGENDS**

264 **Figure 1. Brain slice preparation and visualization. A.** Salamander brains were  
265 dissected and sliced using a vibrating blade microtome. **B.** Coronal brain slices  
266 were placed under the objectives of a microscope coupled with a patch-clamp  
267 electrophysiology setup equipped with a Picospritzer pressure microinjector. **C-D.**  
268 The imaging camera coupled with DIC components was used to visualize the  
269 approach of the patch pipette toward the membrane of neurons for recordings. In  
270 C-D, a slice at the level of the middle reticular nucleus is shown. In C, the horizontal  
271 white dashed line shows the approximate location of the ventricle border. In D,  
272 magnification of the dashed square in C, showing the pipette and a patched  
273 neuron.

274



275 **Figure 2. Whole cell patch-clamp recordings in salamander brain slices of**  
276 **telencephalon, diencephalon or rhombencephalon. A.** Coronal brain slices  
277 (350  $\mu\text{m}$  thickness) were obtained from salamander brains at the level of the  
278 striatum (telencephalon), posterior tuberculum (PT, diencephalon) and middle  
279 reticular nucleus (mRN, rhombencephalon). The black dots illustrate the  
280 approximate location of the region targeted for our recordings. **B.** Patch-clamp  
281 recordings in current-clamp mode obtained from the striatum (B), posterior  
282 tuberculum (C) and middle reticular nucleus (D). Typical neuronal responses to  
283 positive current steps (left panels) and negative current steps (right panels) are  
284 illustrated. **E.** Four local microinjections of the glutamatergic agonist NMDA (50 ms  
285 pulses, 2 mM, 5 psi) applied with a Picospritzer onto the neuron recorded in the  
286 posterior tuberculum. Note that each injection evoked a burst of action potentials.  
287 In B-E, the membrane potential value and the amount of negative current tonically  
288 applied to the cell are indicated on the left part of each panel. Data from B-E were  
289 obtained from three different animals. iRN, inferior reticular nucleus; MLR,  
290 Mesencephalic Locomotor Region; OB, olfactory bulbs; sRN, superior reticular  
291 nucleus.

292

293 **ACKNOWLEDGMENTS.** This work was supported by the Natural Sciences and  
294 Engineering Research Council of Canada (RGPIN-2017-05522 and RTI-2019-  
295 00628 to D.R.); the Canadian Institutes of Health Research (407083 to D.R.); the  
296 Fonds de la Recherche - Québec (FRQS Junior 1 awards 34920 and 36772 to  
297 D.R.); the Centre de Recherche du Centre Hospitalier Universitaire de Sherbrooke  
298 (CHUS); the fonds Jean-Luc Mongrain de la fondation du CHUS; the Faculté de  
299 médecine et des sciences de la santé; the Centre d'excellence en Neurosciences  
300 de l'Université de Sherbrooke.

301 **REFERENCES**

- 302 Chevallier, S., Landry, M., Nagy, F., Cabelguen, J.-M., 2004. Recovery of bimodal  
303 locomotion in the spinal-transected salamander, *Pleurodeles waltlii*. *Eur. J.*  
304 *Neurosci.* 20, 1995–2007. <https://doi.org/10.1111/j.1460-9568.2004.03671.x>
- 305 Chevallier, S., Nagy, F., Cabelguen, J.-M., 2006. Cholinergic control of excitability  
306 of spinal motoneurons in the salamander. *J. Physiol. (Lond.)* 570, 525–540.  
307 <https://doi.org/10.1113/jphysiol.2005.098970>
- 308 Ijspeert, A.J., Crespi, A., Ryczko, D., Cabelguen, J.-M., 2007. From swimming to  
309 walking with a salamander robot driven by a spinal cord model. *Science* 315,  
310 1416–1420. <https://doi.org/10.1126/science.1138353>
- 311 Joven, A., Wang, H., Pinheiro, T., Hameed, L.S., Belnoue, L., Simon, A., 2018.  
312 Cellular basis of brain maturation and acquisition of complex behaviors in  
313 salamanders. *Development* 145. <https://doi.org/10.1242/dev.160051>
- 314 Naujoks-Manteuffel, C., Manteuffel, G., 1988. Origins of descending projections to  
315 the medulla oblongata and rostral medulla spinalis in the urodele *Salamandra*  
316 *salamandra* (amphibia). *J. Comp. Neurol.* 273, 187–206.  
317 <https://doi.org/10.1002/cne.902730205>
- 318 Northcutt, R.G., Kicliter, E., 1980. Organization of the Amphibian Telencephalon,  
319 in: Ebbesson, S.O.E. (Ed.), *Comparative Neurology of the Telencephalon*.  
320 Springer US, Boston, MA, pp. 203–255. [https://doi.org/10.1007/978-1-4613-](https://doi.org/10.1007/978-1-4613-2988-6_8)  
321 [2988-6 8](https://doi.org/10.1007/978-1-4613-2988-6_8)

- 322 Perrins, R., Soffe, S.R., 1996. Local effects of glycinergic inhibition in the spinal  
323 cord motor systems for swimming in amphibian embryos. *J. Neurophysiol.* 76,  
324 1025–1035. <https://doi.org/10.1152/jn.1996.76.2.1025>
- 325 Ryczko, D., Auclair, F., Cabelguyen, J.-M., Dubuc, R., 2016a. The mesencephalic  
326 locomotor region sends a bilateral glutamatergic drive to hindbrain reticulospinal  
327 neurons in a tetrapod. *J. Comp. Neurol.* 524, 1361–1383.  
328 <https://doi.org/10.1002/cne.23911>
- 329 Ryczko, D., Cone, J.J., Alpert, M.H., Goetz, L., Auclair, F., Dubé, C., Parent, M.,  
330 Roitman, M.F., Alford, S., Dubuc, R., 2016b. A descending dopamine pathway  
331 conserved from basal vertebrates to mammals. *Proc. Natl. Acad. Sci. U.S.A.*  
332 113, E2440-2449. <https://doi.org/10.1073/pnas.1600684113>
- 333 Ryczko, D., Knüsel, J., Crespi, A., Lamarque, S., Mathou, A., Ijspeert, A.J.,  
334 Cabelguyen, J.M., 2015. Flexibility of the axial central pattern generator network  
335 for locomotion in the salamander. *J. Neurophysiol.* 113, 1921–1940.  
336 <https://doi.org/10.1152/jn.00894.2014>
- 337 Ryczko, D., Thandiackal, R., Ijspeert, A.J., 2016c. Interfacing a salamander brain  
338 with a salamander-like robot: Control of speed and direction with calcium signals  
339 from brainstem reticulospinal neurons, in: 2016 6th IEEE International  
340 Conference on Biomedical Robotics and Biomechatronics (BioRob). Presented  
341 at the 2016 6th IEEE International Conference on Biomedical Robotics and  
342 Biomechatronics (BioRob), pp. 1140–1147.  
343 <https://doi.org/10.1109/BIOROB.2016.7523785>

- 344 Sánchez-Camacho, C., Marín, O., Ten Donkelaar, H.J., González, A., 2001.  
345 Descending supraspinal pathways in amphibians. I. A dextran amine tracing  
346 study of their cells of origin. *J. Comp. Neurol.* 434, 186–208.  
347 <https://doi.org/10.1002/cne.1172>
- 348 ten Donkelaar, H.J., 1998. Urodeles, in: Nieuwenhuys, R., ten Donkelaar, H.J.,  
349 Nicholson, C. (Eds.), *The Central Nervous System of Vertebrates: Volume 1 /*  
350 *Volume 2 / Volume 3.* Springer, Berlin, Heidelberg, pp. 1045–1150.  
351 [https://doi.org/10.1007/978-3-642-18262-4\\_18](https://doi.org/10.1007/978-3-642-18262-4_18)
- 352 Wheatley, M., Stein, R.B., 1992. An in vitro preparation of the mudpuppy for  
353 simultaneous intracellular and electromyographic recording during locomotion.  
354 *J. Neurosci. Methods* 42, 129–137. [https://doi.org/10.1016/0165-](https://doi.org/10.1016/0165-0270(92)90143-2)  
355 [0270\(92\)90143-2](https://doi.org/10.1016/0165-0270(92)90143-2)
- 356 Yaeger, D.B., Coddington, E.J., 2018. Calcium-induced calcium release activates  
357 spontaneous miniature outward currents in newt medullary reticular formation  
358 neurons. *J. Neurophysiol.* 120, 3140–3154.  
359 <https://doi.org/10.1152/jn.00616.2017>

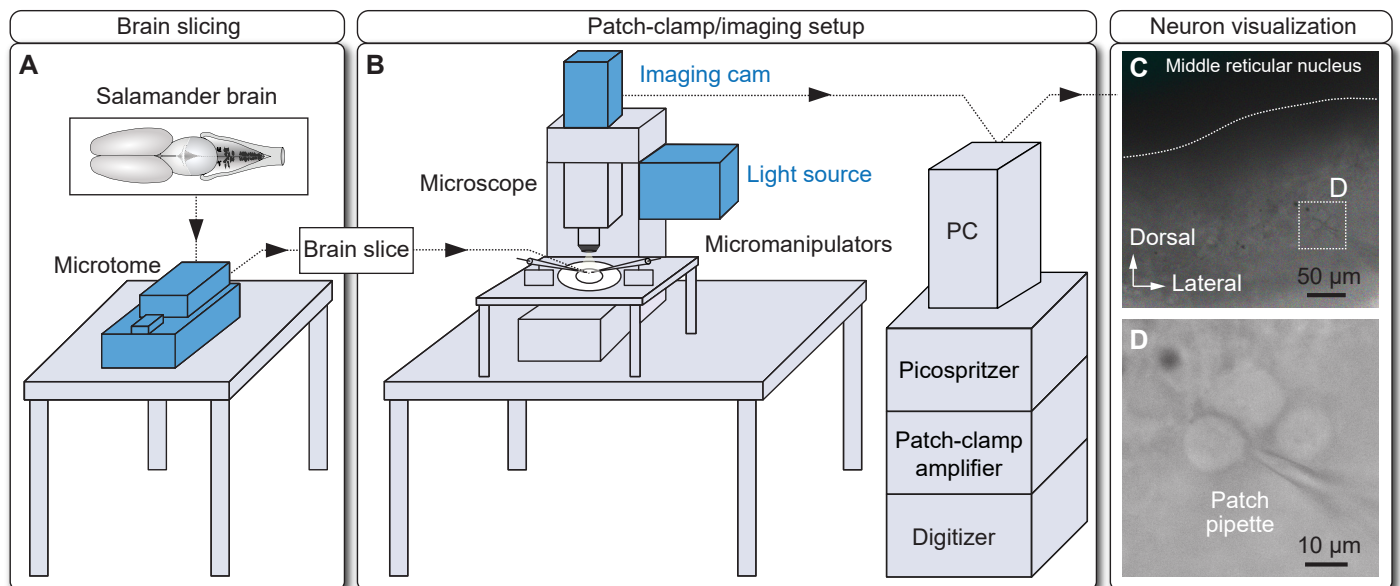

Figure 1

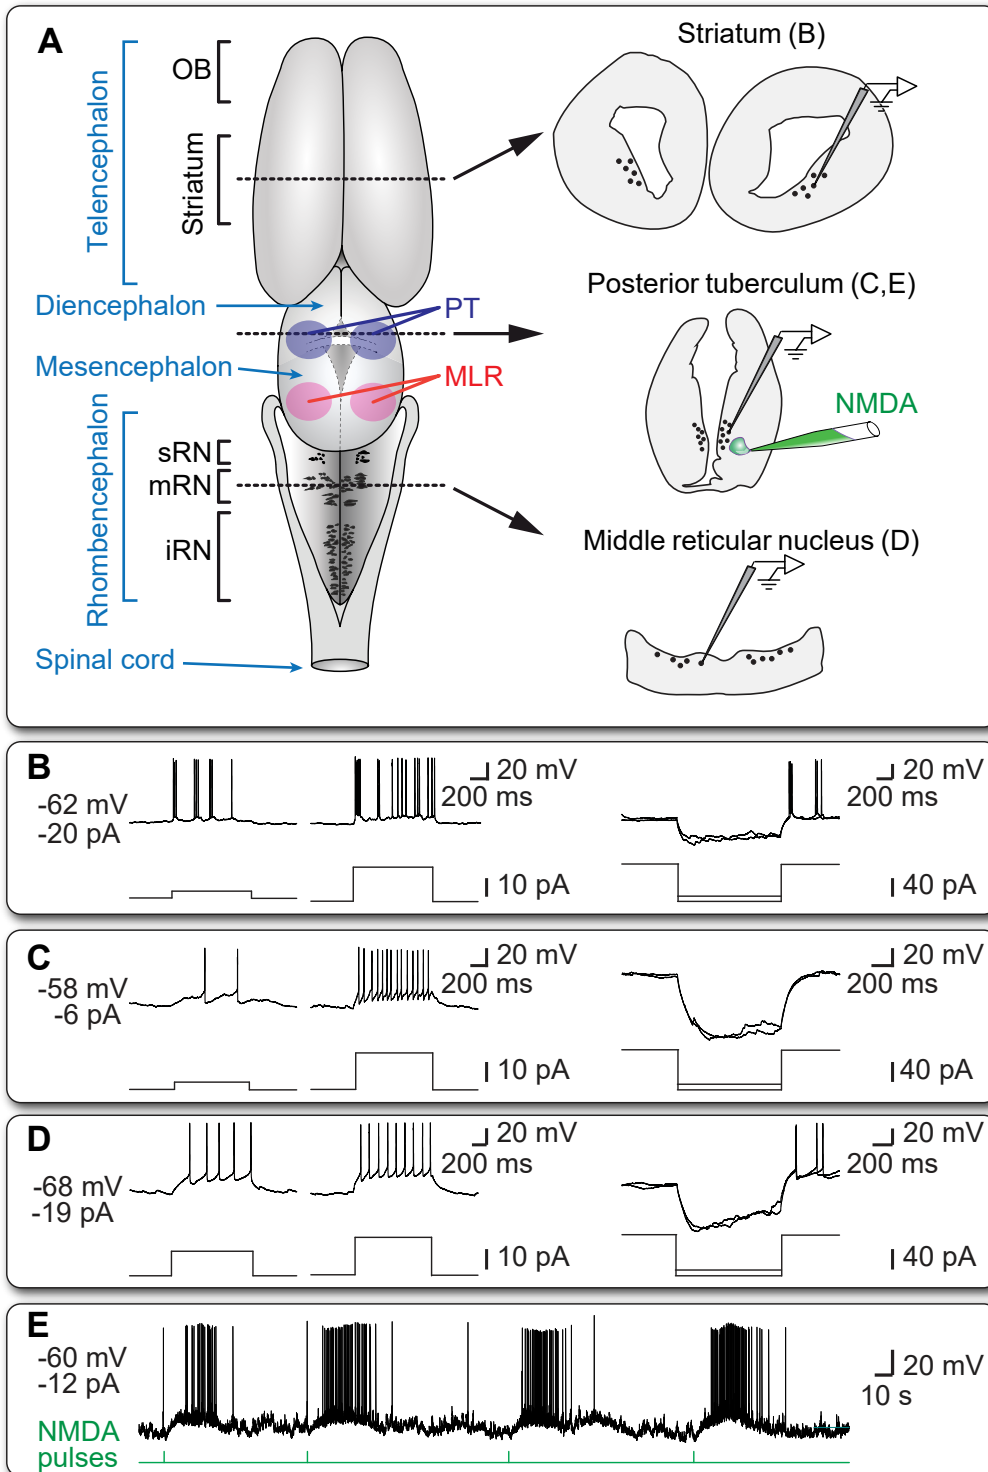

Figure 2
